# Supplementary material for: A Metaheuristic Algorithm for Flexible Energy Storage Management in Residential Electricity Distribution Grids
Source: MDPI journal article supplement (doi:10.3390/math9192375), 2021-09-24
Supplement: s1 [file s1]

Supplementary Materials:

Table S1. the consumer and prosumer data used in the study.

| No. | Pole index | Prosumer code | Connection phase | Generation, kWh |     |     |     |     |       |       |       |       |       |       |       |       |       |       |       |       |       |     |     |     |     |     |     |
|-----|------------|---------------|------------------|-----------------|-----|-----|-----|-----|-------|-------|-------|-------|-------|-------|-------|-------|-------|-------|-------|-------|-------|-----|-----|-----|-----|-----|-----|
|     |            |               |                  | h01             | h02 | h03 | h04 | h05 | h06   | h07   | h08   | h09   | h10   | h11   | h12   | h13   | h14   | h15   | h16   | h17   | h18   | h19 | h20 | h21 | h22 | h23 | h24 |
| 1   | 18         | 12            | c                | 0               | 0   | 0   | 0   | 0   | 1.071 | 1.214 | 1.372 | 1.379 | 1.484 | 1.52  | 1.513 | 1.534 | 1.517 | 1.425 | 1.225 | 1.094 | 1.041 | 0   | 0   | 0   | 0   | 0   | 0   |
| 2   | 27         | 28            | a                | 0               | 0   | 0   | 0   | 0   | 0.67  | 0.71  | 0.786 | 0.864 | 0.989 | 1.115 | 1.169 | 1.315 | 1.099 | 0.998 | 0.847 | 0.784 | 0.597 | 0   | 0   | 0   | 0   | 0   | 0   |
| 3   | 37         | 44            | c                | 0               | 0   | 0   | 0   | 0   | 0.787 | 0.928 | 1.095 | 1.11  | 1.213 | 1.25  | 1.245 | 1.271 | 1.247 | 1.154 | 0.944 | 0.801 | 0.746 | 0   | 0   | 0   | 0   | 0   | 0   |
| 4   | 39         | 47            | c                | 0               | 0   | 0   | 0   | 0   | 0.728 | 0.876 | 1.082 | 1.146 | 1.214 | 1.275 | 1.213 | 1.288 | 1.268 | 1.164 | 0.959 | 0.768 | 0.702 | 0   | 0   | 0   | 0   | 0   | 0   |
| 5   | 56         | 77            | a                | 0               | 0   | 0   | 0   | 0   | 1.458 | 1.608 | 1.795 | 1.775 | 1.891 | 1.923 | 1.881 | 1.942 | 1.901 | 1.784 | 1.547 | 1.425 | 1.367 | 0   | 0   | 0   | 0   | 0   | 0   |
| 6   | 63         | 83            | b                | 0               | 0   | 0   | 0   | 0   | 0.083 | 0.173 | 0.335 | 0.527 | 0.578 | 0.62  | 0.638 | 0.661 | 0.585 | 0.521 | 0.305 | 0.165 | 0.103 | 0   | 0   | 0   | 0   | 0   | 0   |
| 7   | 119        | 94            | b                | 0               | 0   | 0   | 0   | 0   | 0.988 | 1.121 | 1.307 | 1.365 | 1.426 | 1.481 | 1.425 | 1.492 | 1.474 | 1.381 | 1.196 | 1.025 | 0.965 | 0   | 0   | 0   | 0   | 0   | 0   |
| 8   | 85         | 107           | a                | 0               | 0   | 0   | 0   | 0   | 1.357 | 1.536 | 1.647 | 1.689 | 1.781 | 1.806 | 1.773 | 1.835 | 1.825 | 1.636 | 1.448 | 1.339 | 1.286 | 0   | 0   | 0   | 0   | 0   | 0   |
